# Supplementary material for: Wide dissemination of colistin-resistant Escherichia coli with the mobile resistance gene mcr in healthy residents in Vietnam
Source: Oxford University Press journal article supplement (doi:10.1093/jac/dky435), 2018-10-04
Supplement: dky435_supplementary_data.docx [file dky435_supplementary_data.docx]

**Supplementary data**


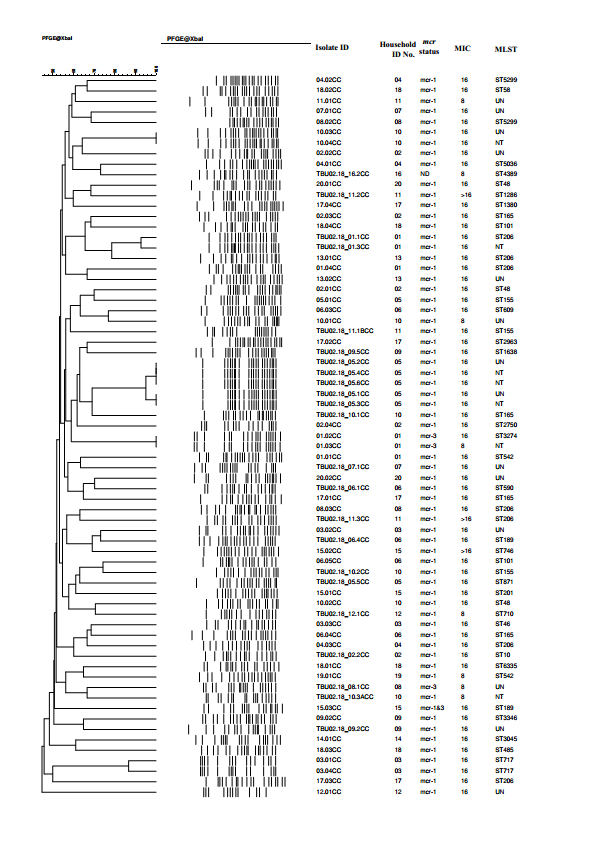


**Figure S1.** Dendrogram of PFGE patterns among colistin-resistant *E. coli* isolates

ND, not detected; MIC, mg/L; UN, unknown; NT, not tested.

**Table S1.** Percentages of colistin-resistant *E. coli* isolates that exhibited resistance to other antibiotics

| Antimicrobial agent class | | | Antimicrobial agents | Resistance % |
| --- | --- | --- | --- | --- |
| β-Lactams | Penicillins |  | AMP | 91.3 |
|  | Cephalosporins | 2nd generation | FOX | 7.2 |
|  |  | 3rd generation | CTX | 7.2 |
|  |  |  | CAZ | 1.4 |
|  | Carbapenem |  | MEM | 0 |
| Aminoglycosides |  |  | STR | 65.2 |
|  |  |  | KAN | 42.0 |
|  |  |  | GEN | 33.3 |
| Quinolones |  |  | CIP | 15.9 |
|  |  |  | NAL | 33.3 |
| Tetracycline |  |  | TET | 91.3 |
| Phenicol |  |  | CHL | 85.5 |
| Phosphomycin |  |  | FOF | 0 |
| Folic acid inhibitors |  |  | SXT | 76.8 |
|  | | |  |  |

Sixty nine colistin-resistant *E. coli* isolates were tested.

AMP, ampicillin; FOX, cefoxitin; CTX. cefotaxime; CAZ, ceftazidime;

MEM, meropenem; STR, streptomycin; KAN, kanamycin; GEN, gentamicin;

CIP, ciprofloxacin; NAL, nardixic acid; TET, tetracycline; CHL, chloramphenicol;

FOF, fosfomycin; SXT, trimethoprim-sulfamethoxazole.
